# Supplementary material for: Crystallinity and Defect Reduction in Cs₂AgBiBr₆ : Key Factors for Enhanced Optoelectronic Devices
Source: Research Square preprint supplement (doi:10.21203/rs.3.rs-6576935/v1), 2025-05-19
Supplement: Supplementary file 1 [file b8f555695491f7fee2fe810a.pdf]

# Supporting Information

## Crystallinity and Defect Reduction in $\text{Cs}_2\text{AgBiBr}_6$ : Key Factors for Enhanced Optoelectronic Devices

Fahad K. Alshammari <sup>a</sup>, Achref Jebnoui <sup>b</sup>, Mohamed Bouzidi <sup>a</sup>, Sana Ben Khalifa <sup>c</sup>, Mohamed Ben Bechir <sup>\*, d, e</sup>

<sup>a</sup> *Department of Physics, College of Science, University of Ha'il, P.O. Box 2440, Ha'il, Saudi Arabia*

<sup>b</sup> *Medical Surgical Nursing Department, College of Nursing, University of Ha'il, Ha'il, Saudi Arabia*

<sup>c</sup> *Department of Physics, College of Science, Qassim University, P.O. Box 6644, Buraydah Almolaydah, 51452, Saudia Arabia*

<sup>d</sup> *Laboratory of Spectroscopic and Optical Characterization of Materials (LaSCOM), Faculty of Sciences, University of Sfax, Tunisia.*

<sup>e</sup> *Department of Physics, Faculty of Sciences of Gafsa, University of Gafsa, 2112, Tunisia.*

<sup>\*</sup> *Corresponding author. E-mail address: [mohamedbenbechir@hotmail.com](mailto:mohamedbenbechir@hotmail.com)*

## Supplementary Figures

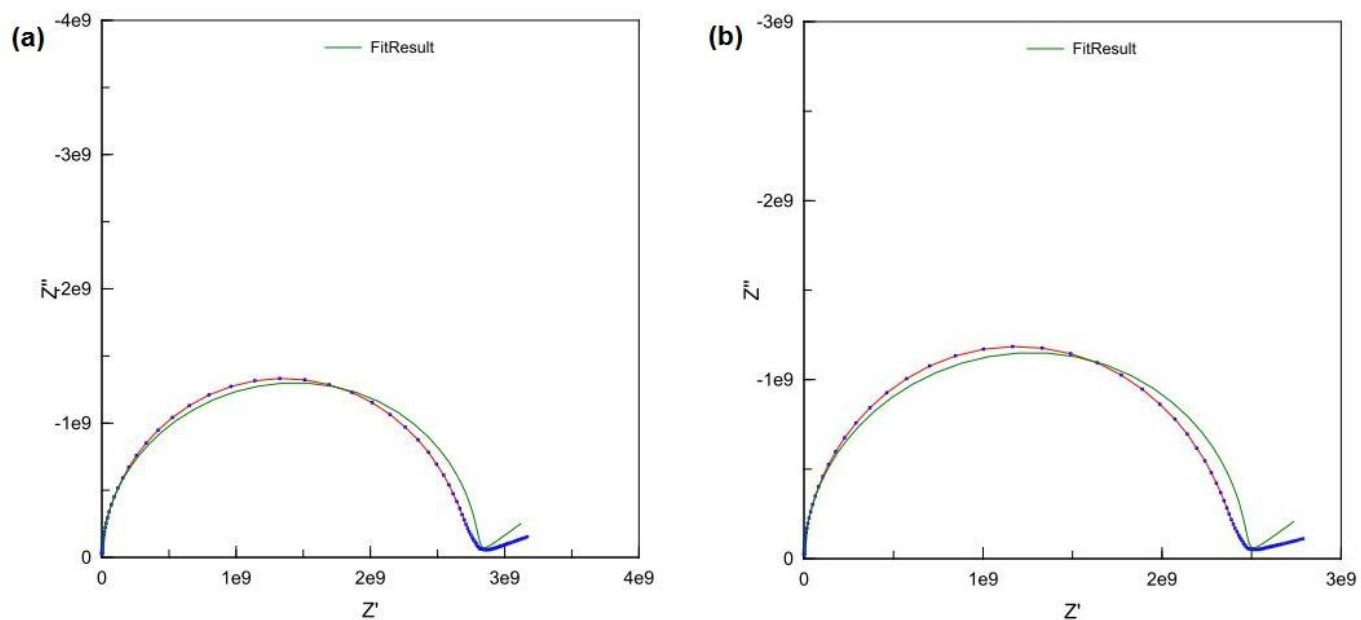

**Figure. S1.** Nyquist Plot Fitting Using ZView Software: (a) SCG and (b) SAG.

## Supplementary Tables

**Table S1.** Full Width at Half Maximum (FWHM) Values for XRD Peaks of Cs<sub>2</sub>AgBiBr<sub>6</sub> Crystals.

| Miller indices (hkl) | FWHM (°) |       | L <sub>s</sub> (%) |       |
|----------------------|----------|-------|--------------------|-------|
|                      | SCG      | SAG   | SCG                | SAG   |
| (111)                | 0.088    | 0.056 | 0.183              | 0.116 |
| (222)                | 0.072    | 0.048 | 0.072              | 0.048 |
| (333)                | 0.104    | 0.072 | 0.067              | 0.047 |
| (444)                | 0.080    | 0.056 | 0.037              | 0.026 |

**Table S2.** Extracted Circuit Parameters from Nyquist Plots for SCG and SAG Crystals.

|                   | SCG                    | SAG                    |
|-------------------|------------------------|------------------------|
| $R_g (\Omega)$    | $8.48 \times 10^8$     | $6.64 \times 10^8$     |
| $C_g (F)$         | $1.44 \times 10^{-14}$ | $1.75 \times 10^{-14}$ |
| $R_{gb} (\Omega)$ | $1.93 \times 10^9$     | $1.78 \times 10^9$     |
| $C_{gb} (F)$      | $1.49 \times 10^{-14}$ | $1.56 \times 10^{-14}$ |
| $CPE_e (F)$       | $1.13 \times 10^{-9}$  | $1.36 \times 10^{-9}$  |
| $\alpha_e$        | 0.403                  | 0.399                  |

## Supplementary Equations

The parameter  $L_s$  is calculated using the following expression:

$$L_s = \frac{B_s}{4 \tan \theta} \quad (S1)$$

In this context,  $B_s$  denotes the contribution of structural broadening, representing the difference in the full width at half maximum (FWHM) between the investigated sample and a reference standard.

To isolate the structural broadening component,  $B_s$  is obtained through the relation :

$$B_{struct} = \sqrt{B_{obs}^2 - B_{std}^2} \quad (S2)$$

Here,  $B_{obs}$  corresponds to the observed peak broadening from the sample being examined, while  $B_{std}$  refers to the peak width measured from a standard material, which is assumed to exhibit negligible or no structural broadening effects.

The density of trap states,  $n_{trap}$ , can be determined using the following relation :

$$n_{trap} = \frac{2\varepsilon\varepsilon_0V_{TFL}}{eL^2} \quad (S3)$$

In this expression:

- $\varepsilon_0$  represents the permittivity of free space, valued at  $8.85 \times 10^{-12}$  F/m,

- $\epsilon$  is the relative dielectric constant specific to  $\text{Cs}_2\text{AgBiBr}_6$ , with a value of 16.7,
- $e$  denotes the elementary charge of an electron ( $1.6 \times 10^{-19}$  C),
- $L$  refers to the thickness of the single crystal sample, which is 1.4 mm.

The photoresponsivity ( $R$ ) of the material is calculated using the following equation:

$$R = \frac{I_{ph} - I_D}{P_{irra} S} \quad (\text{S4})$$

In this formula:

- $I_{ph}$  refers to the photocurrent measured under illumination,
- $I_D$  represents the current measured in the dark,
- $P_{irra}$  is the power of the incident radiation,
- $S$  denotes the surface area of the crystal exposed to light.

To evaluate the specific detectivity ( $D^*$ ), the following relation is used:

$$D^* = \frac{R}{(2eI_D)^{1/2}} \quad (\text{S5})$$

Here,  $e$  is the elementary charge, and  $I_D$  is the dark current. The diffusion coefficient ( $D$ ), which reflects the rate of molecular diffusion, is expressed as:

$$D = D_0 e^{\left(-\frac{\Delta H}{RT}\right)} \quad (\text{S5})$$

Where:

- $D_0$  is the pre-exponential diffusion constant,
- $\Delta H$  represents the activation energy required for diffusion,
- $T$  is the absolute temperature of the system, and
- $R$  is the universal gas constant.
